# Supplementary material for: Recombinant rabies virus expressing dog GM-CSF is an efficacious oral rabies vaccine for dogs
Source: PubMed Central journal article supplement (PMC4770717; doi:10.18632/oncotarget.5904), 2015-09-30
Supplement: oncotarget-06-38504-s001.pdf [file oncotarget-06-38504-s001.pdf]

## Recombinant rabies virus expressing dog GM-CSF is an efficacious oral rabies vaccine for dogs

### Supplementary Material

S1Table: Primers used for detection of surface co-stimulating molecules on DC (CD11c, CD80) and B cell (CD19, CD40) by qRT-PCR

| Name           | Upper primer(5'-3')       | Lower primer(5'-3')        |
|----------------|---------------------------|----------------------------|
| $\beta$ -actin | CTGAAGTACCCCATTGAGCACGGCA | GGGTCATCTTCTCACGGTTGGCCTT  |
| CD19           | CCGTCGAGATGCAGCTGAAGGTCAT | GTCTGGTGGGATCGGTCATTCGCTT  |
| CD11c          | CCATCTACACCGTGATCAGCAGCCA | ACAGGCATCCCATTTCAGCTCCACAG |
| CD40           | TCTACCCAGAACCACGCACTGCATG | CTGACGTGCCCTCCTTCTCGACATG  |
| CD80           | GTTTCCCAAGACCCGGACACTGAGT | GGGAGGGTGTGGCTCGACTGATTTT  |

S2Table: Primers used in nested RT-PCR for detection of virus genomic RNA and sense transcribed RNA

| Name | Primer (5'-3')                   |
|------|----------------------------------|
| 509  | GAGAAAGAACTTCAAGA                |
| 304  | TTGACGAAGATCTTGCTCAT             |
| 504  | TATACTCGAATCATGATGAATGGAGGTCGACT |
| 105  | TTCTTATGAGTCACTCGAATATGTCTTGTTAG |
